# Supplementary material for: Auditory mismatch responses are differentially sensitive to changes in muscarinic acetylcholine versus dopamine receptor function
Source: eLife journal article supplement (doi:10.7554/elife.74835), 2022-04-27
Supplement: supp [file elife_poa_e74835_Figure_2_figure_supplement_3.pdf › elife_poa_e74835_Figure_2_figure_supplement_3.pdf]

## A Mismatch at FCz (study 1)

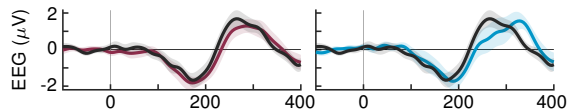

## B Mismatch at FCz (study 2)

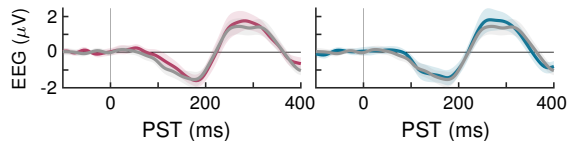

MMN (dev - sta) in placebo — placebo —  
 MMN (dev - sta) in amisulpride — levodopa —  
 MMN (dev - sta) in biperiden — galantamine —

## C Drug effects on mismatch (study 1)

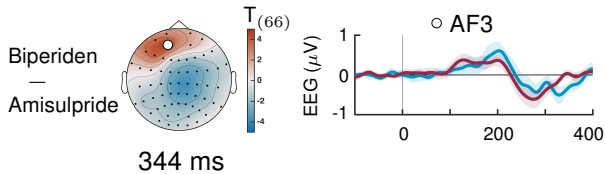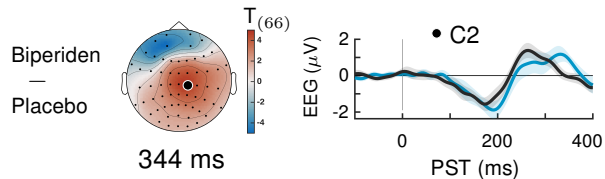

MMN (dev - sta) in placebo —  
 MMN (dev - sta) in amisulpride —  
 MMN (dev - sta) in biperiden —
