# Supplementary figures and images for: Auditory mismatch responses are differentially sensitive to changes in muscarinic acetylcholine versus dopamine receptor function
Source: eLife journal article supplement (doi:10.7554/elife.74835), 2022-04-27

# Effects of mismatch (study 1)

## A Standards > deviants

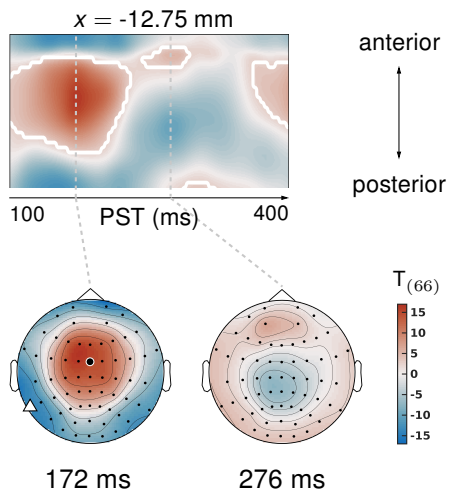

## B ERPs at selected sensors

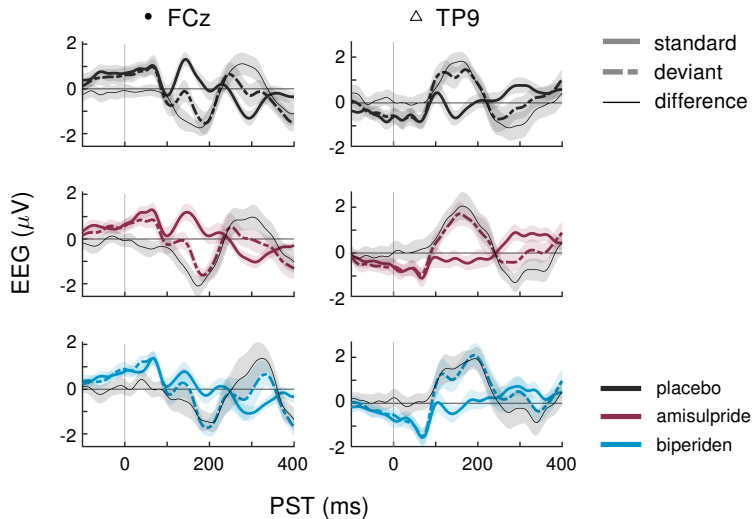

Supplement: supp [file elife_poa_e74835_Figure_2_figure_supplement_1.pdf › elife_poa_e74835_Figure_2_figure_supplement_1.pdf]

# Effects of mismatch (study 2)

## A Standards > deviants

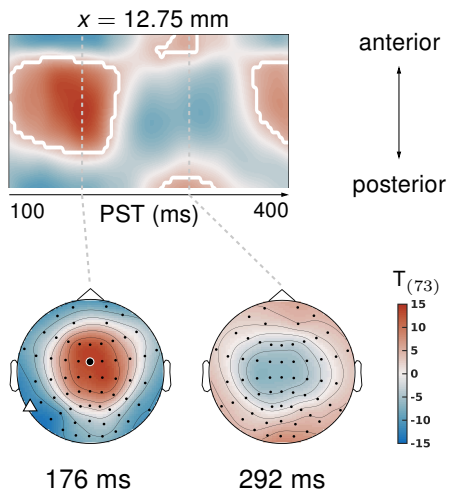

## B ERPs at selected sensors

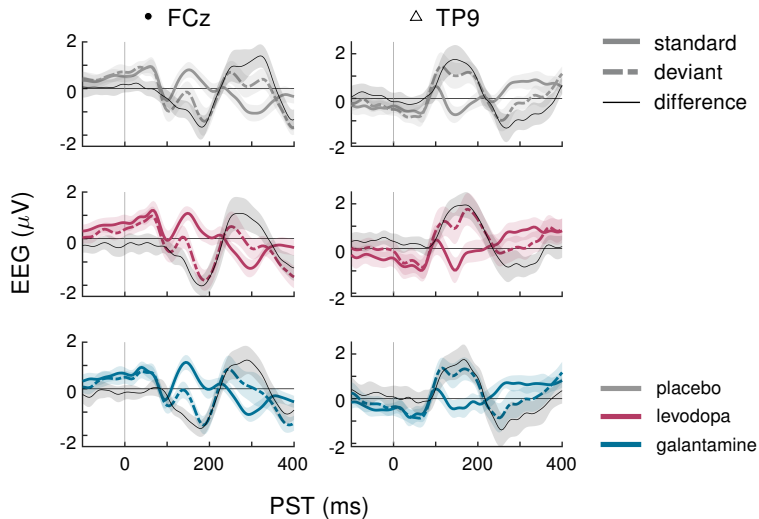

Supplement: supp [file elife_poa_e74835_Figure_2_figure_supplement_2.pdf › elife_poa_e74835_Figure_2_figure_supplement_2.pdf]

# Interaction mismatch $\times$ stability at sensor C3

## A Study 1

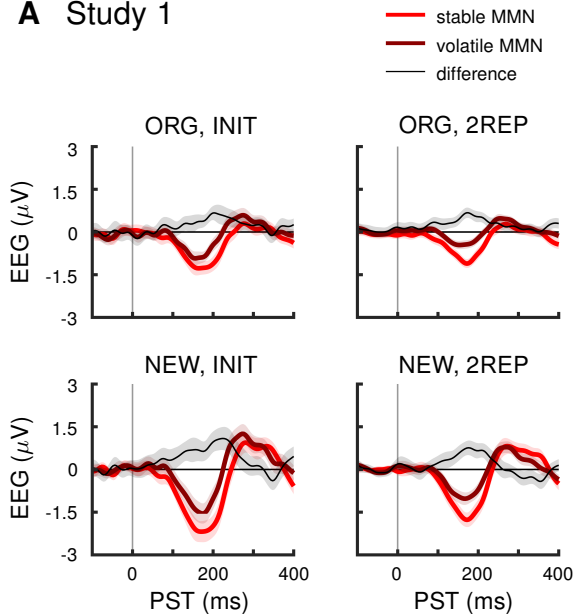

## B Study 2

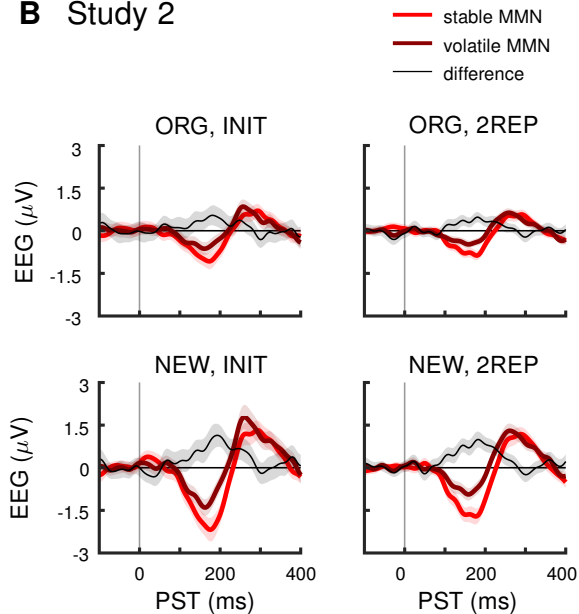

Supplement: supp [file elife_poa_e74835_Figure_3_figure_supplement_1.pdf › elife_poa_e74835_Figure_3_figure_supplement_1.pdf]
